# Supplementary material for: Metal–organic complex coating for enhanced corrosion control and biocompatibility on biodegradable magnesium alloy for orthopaedic implants
Source: Royal Society of Chemistry journal article supplement (doi:10.1039/d4tb00347k), 2024-01-01
Supplement: d4tb00347k1.pdf [file d4tb00347k1.pdf]

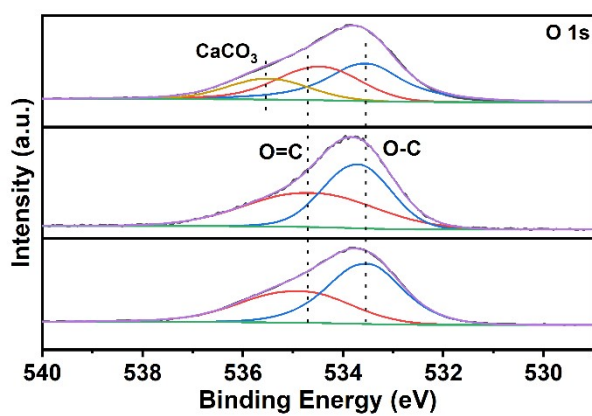

Fig. s1 High-resolution XPS spectra of O 1s.

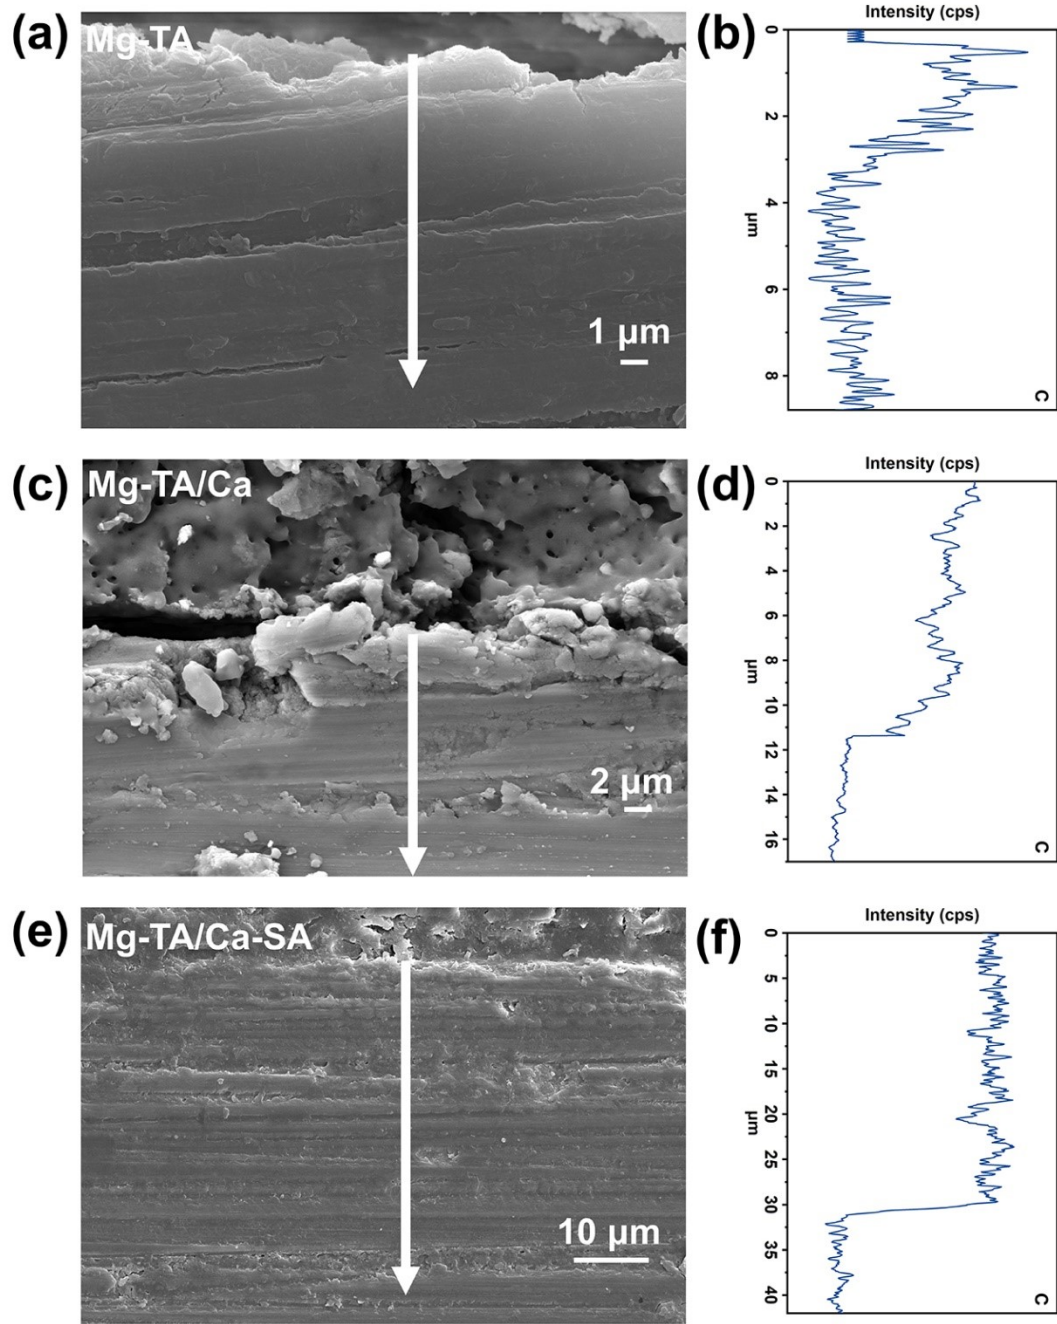

**Fig. s2.** (a), (c) and (e) Cross-sectional SEM morphology; (b), (d), (f) EDS line scanning results.
